# Supplementary material for: Determination of Multiclass Antibiotics in Fish Muscle Using a QuEChERS-UHPLC-MS/MS Method
Source: MDPI journal article supplement (doi:10.3390/foods13071081), 2024-04-01
Supplement: s1 [file s1]

# Determination of Multiclass Antibiotics in Fish Muscle Using a QuEChERS-UHPLC-MS/MS Method

Yousra Aissaoui <sup>1,2</sup>, Gabriel Jiménez-Skrzypek <sup>2,3</sup>, Javier González-Sálamo <sup>2,3</sup>, Malika Trabelsi-Ayadi <sup>4</sup>, Ibtissem Ghorbel-Abid <sup>1,4,\*</sup> and Javier Hernández-Borges <sup>2,3,\*</sup>

<sup>1</sup> Useful Materials Laboratory (LMU), National Institute for Physical and Chemical Research and Analysis (INRAP), Ariana 2020, Tunisia; yousra.issaoui@fsb.ucar.tn

<sup>2</sup> Departamento de Química, Unidad Departamental de Química Analítica, Facultad de Ciencias, Universidad de La Laguna (ULL), Avda. Astrofísico Fco. Sánchez, s/n, 38206 San Cristóbal de La Laguna, Spain; gjimenez@ull.edu.es (G.J.-S.); jgsalamo@ull.edu.es (J.G.-S.)

<sup>3</sup> Instituto Universitario de Enfermedades Tropicales y Salud Pública de Canarias, Universidad de La Laguna (ULL), Avda. Astrofísico Fco. Sánchez, s/n, 38206 San Cristóbal de La Laguna, Spain

<sup>4</sup> Laboratory of Application Chemistry to the Resources and Natural Substances and the Environment (LACReSNE), Faculty of Science of Bizerte, University of Carthage, Zarzouna, Bizerte 7021, Tunisia; malika.trabelsiyadi@gmail.com

\* Correspondence: ibtissem.gh.ab@gmail.com (I.G.-A.); jhborges@ull.edu.es (J.H.-B.)

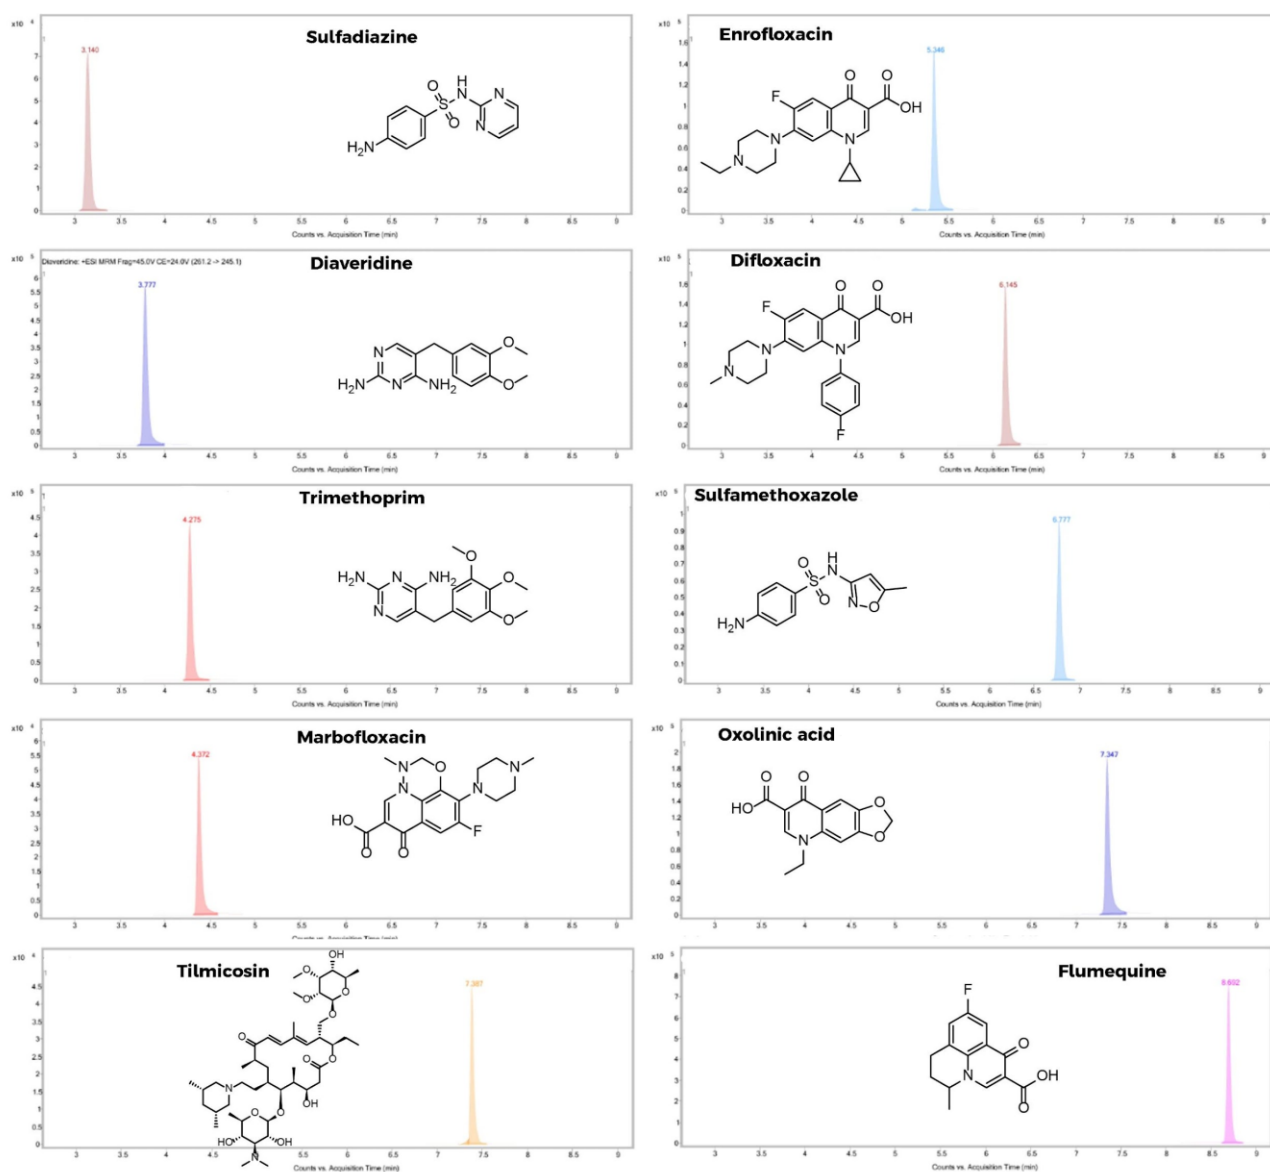

**Figure S1.** UHPLC-MS/MS dynamic MRM chromatogram at 400 ng/g of the different analytes studied in this paper.

## European seabass

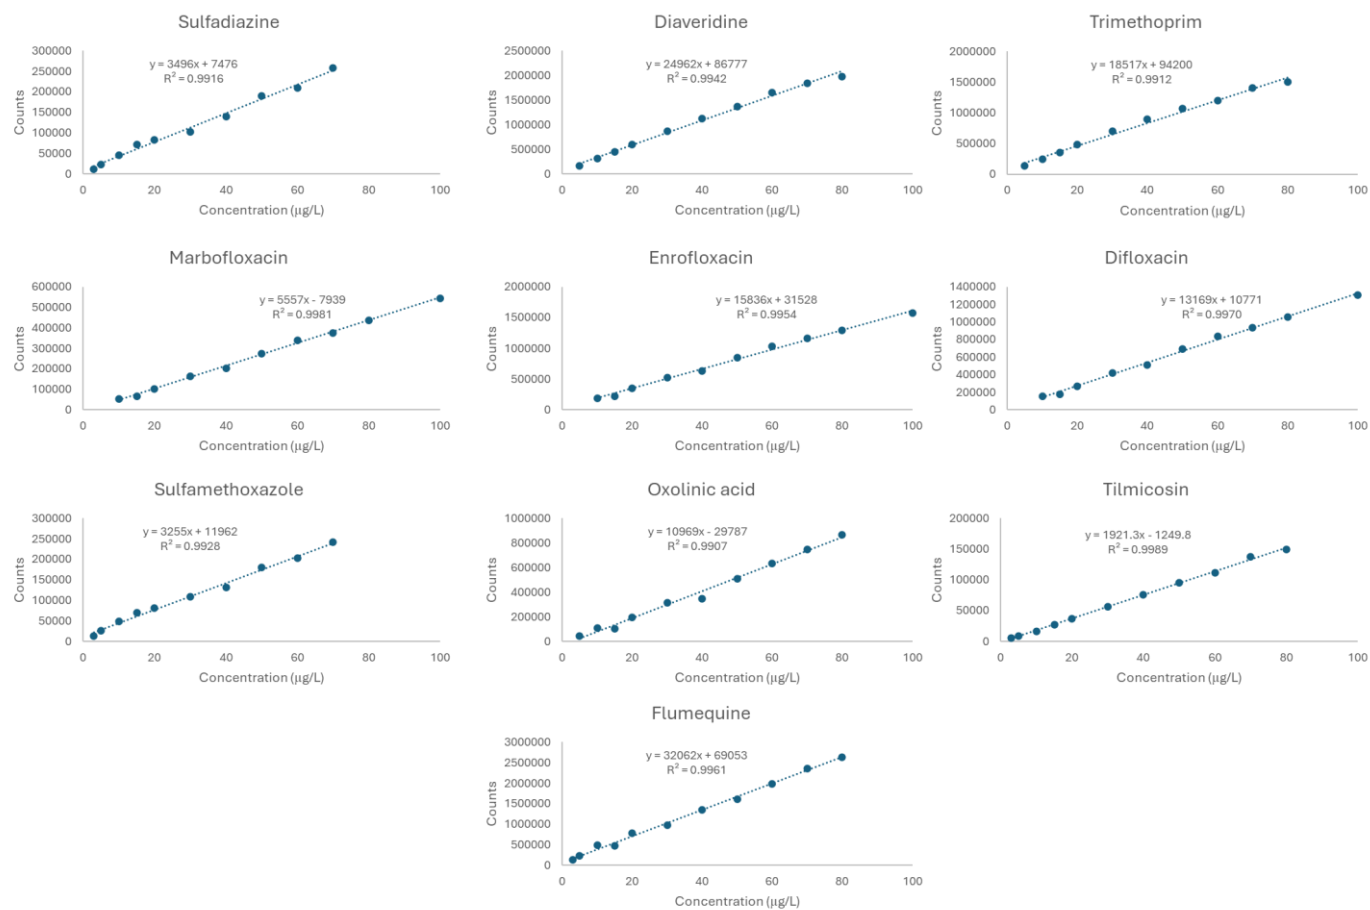

**Figure S2.** Calibration curves of the different analytes in European seabass.

### Gilt-head bream

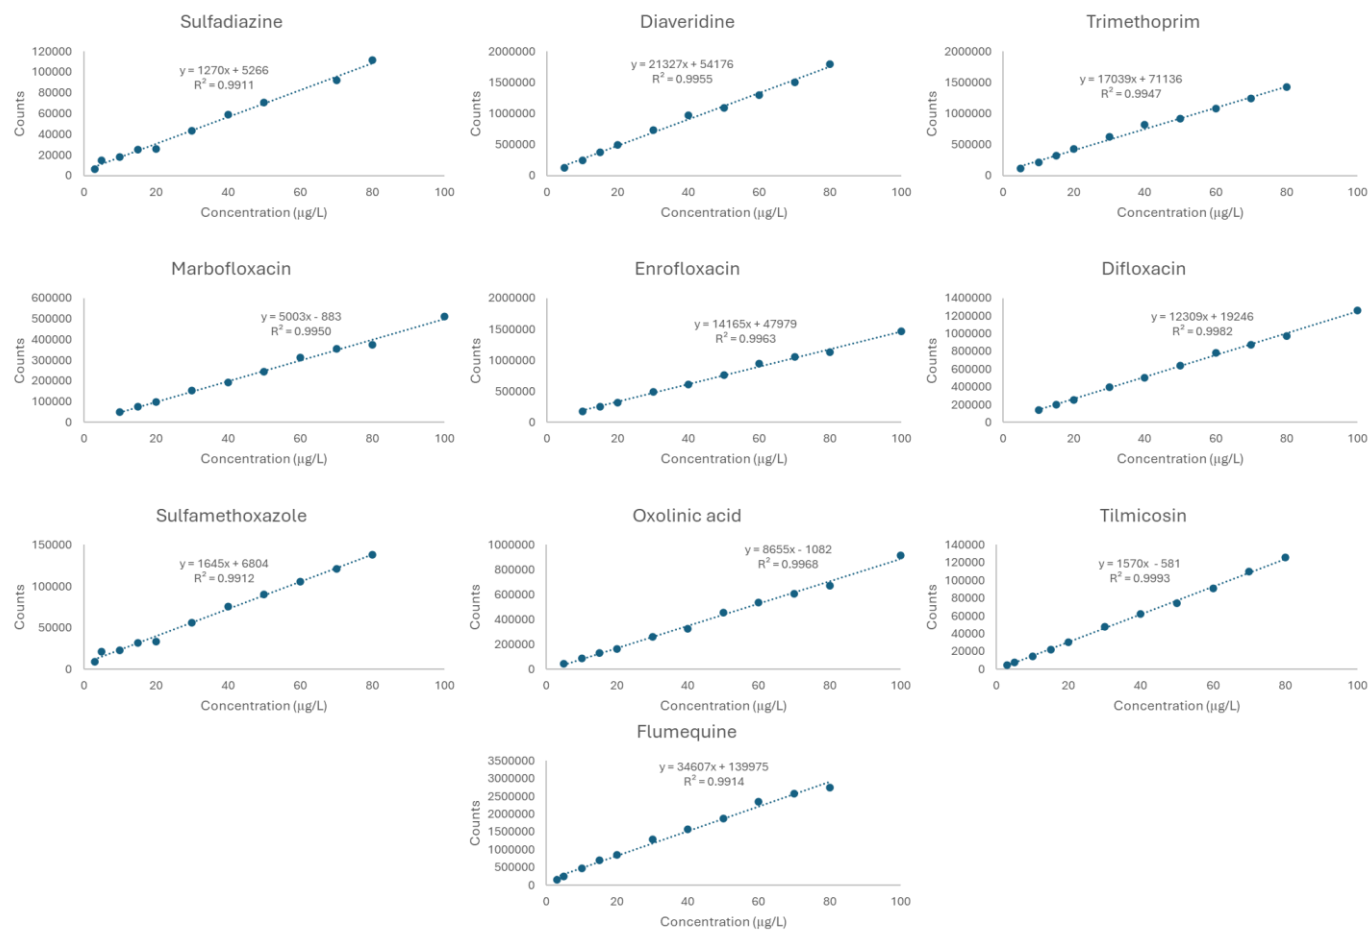

**Figure S3.** Calibration curves of the different analytes in gilt-head seabream.

# European Seabass

## Oxolinic acid

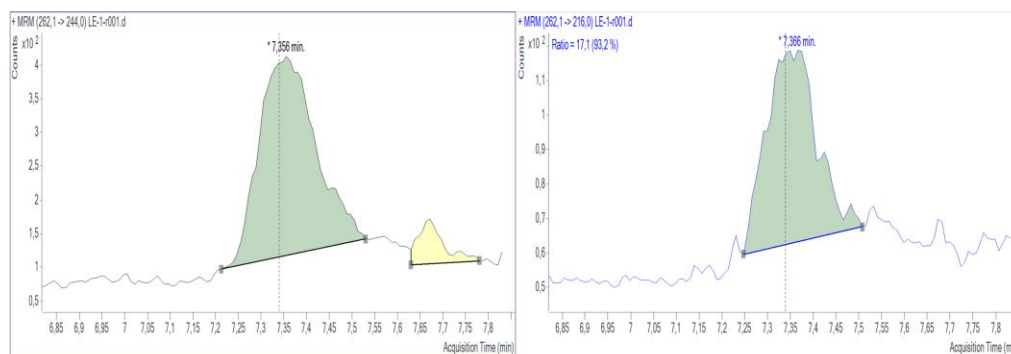

## Sample 5

## Tilmicosin

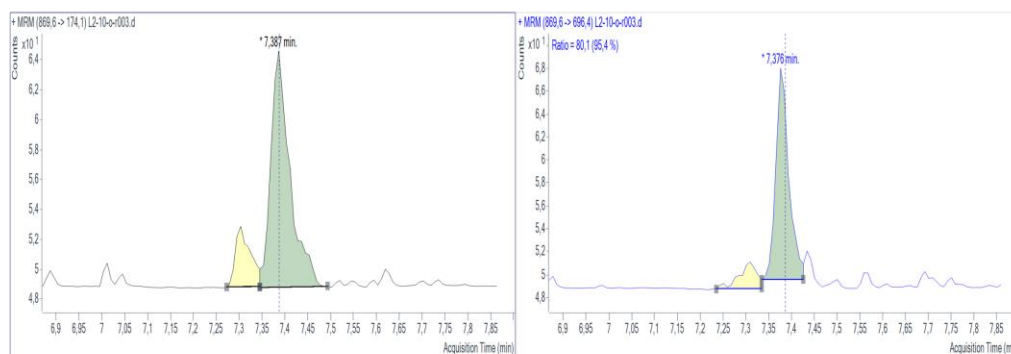

## Sample 9

**Figure S4.** Representative quantifier and qualifier UHPLC-MS/MS dynamic MRM chromatograms of two of the analytes detected (below the LOQ of the method) in real samples. Quantifier peaks, delineated by a black contour line, and qualifier peaks, delineated by a blue contour line. All samples exhibited a S/N ratio equal or higher than 10 and quantifier/qualifier ratios were satisfactory.

**Table S1.-** Chemical structure and properties of the studied antibiotics.

| Analyte       | Structure                                                                           | Molecular formula                                                            | MM (g/mol) | Solubility in water (25 °C) | Vapor pressure (mmHg, 25 °C) | Log K <sub>ow</sub> | Melting point (°C) | Boiling point (°C) |
|---------------|-------------------------------------------------------------------------------------|------------------------------------------------------------------------------|------------|-----------------------------|------------------------------|---------------------|--------------------|--------------------|
| Sulfadiazine  | 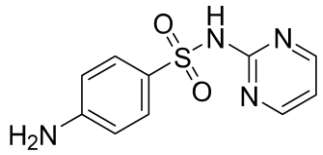   | C <sub>10</sub> H <sub>10</sub> N <sub>4</sub> O <sub>2</sub> S              | 250.28     | 77 mg/L                     | 1.28·10 <sup>-10</sup>       | -0.09               | 255.5              | 512.6              |
| Diaveridine   |    | C <sub>13</sub> H <sub>16</sub> N <sub>4</sub> O <sub>2</sub>                | 260.29     | -                           | 2.29·10 <sup>-10</sup>       | 0.97                | 233                | 506.1              |
| Trimethoprim  |    | C <sub>14</sub> H <sub>18</sub> N <sub>4</sub> O <sub>3</sub>                | 290.32     | <1 g/L                      | 0.0 ± 0.9                    | 0.91                | 199-203            | 526                |
| Marbofloxacin |   | C <sub>17</sub> H <sub>19</sub> FN <sub>4</sub> O <sub>4</sub>               | 362.36     | -                           | 7.45·10 <sup>-10</sup>       | -0.5                | 268-269            | 571                |
| Enrofloxacin  |  | C <sub>19</sub> H <sub>22</sub> F <sub>1</sub> N <sub>3</sub> O <sub>3</sub> | 359.40     | > 53.9 mg/L                 | -                            | 0.70                | 221-226            | 560.5              |

| Analyte          | Structure                                                                         | Molecular formula                                               | MM (g/mol) | Solubility in water (25 °C) | Vapor pressure (mmHg, 25 °C) | Log K <sub>ow</sub> | Melting point (°C) | Boiling point (°C) |
|------------------|-----------------------------------------------------------------------------------|-----------------------------------------------------------------|------------|-----------------------------|------------------------------|---------------------|--------------------|--------------------|
| Difloxacin       | 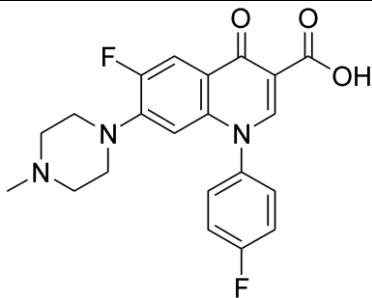 | C <sub>19</sub> H <sub>20</sub> FN <sub>3</sub> O <sub>3</sub>  | 357.38     | -                           | -                            | 0.89                | 322.44             | 595.5              |
| Sulfamethoxazole |  | C <sub>10</sub> H <sub>11</sub> N <sub>3</sub> O <sub>3</sub> S | 253.28     | <1 g/L                      | -                            | 0.89                | 166-169            | 482.1              |
| Oxolinic acid    |  | C <sub>13</sub> H <sub>11</sub> NO <sub>5</sub>                 | 261.23     | -                           | -                            | 0.94                | 314-316            | 473.2              |

| Analyte    | Structure                                                                         | Molecular formula                                              | MM (g/mol) | Solubility in water (25 °C) | Vapor pressure (mmHg, 25 °C) | Log K <sub>ow</sub> | Melting point (°C) | Boiling point (°C) |
|------------|-----------------------------------------------------------------------------------|----------------------------------------------------------------|------------|-----------------------------|------------------------------|---------------------|--------------------|--------------------|
| Tilmicosin | 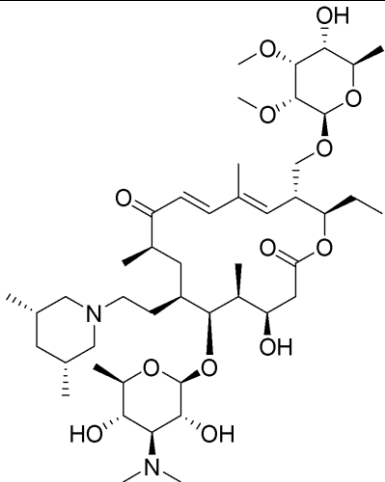 | C <sub>46</sub> H <sub>80</sub> N <sub>2</sub> O <sub>13</sub> | 869.13     | -                           | -                            | 3.8                 | -                  | 926.6              |
| Flumequine |  | C <sub>14</sub> H <sub>12</sub> FNO <sub>3</sub>               | 252        | -                           | -                            | 1.6                 | 253-255            | 439.7              |

Data taken from SciFinder® and PubChem databases. MM: Molecular mass.

"-", data not available.



**Table S2.** Operational MS/MS conditions and the m/z transitions of the target compounds.

| Analyte          |            | Precursor ion (m/z) | Product ion (m/z) | Collision energy (eV) | Polarity |
|------------------|------------|---------------------|-------------------|-----------------------|----------|
| Sulfadiazine     | Quantifier | 251.0               | 156.0             | 10                    | Positive |
|                  | Qualifier  | 251.0               | 108.0             | 22                    | Positive |
| Diaveridine      | Quantifier | 261.2               | 245.1             | 24                    | Positive |
|                  | Qualifier  | 261.2               | 123.1             | 26                    | Positive |
| Trimethoprim     | Quantifier | 291.1               | 230.1             | 20                    | Positive |
|                  | Qualifier  | 291.1               | 123.1             | 40                    | Positive |
| Marbofloxacin    | Quantifier | 363.0               | 345.1             | 17                    | Positive |
|                  | Qualifier  | 363.0               | 320.1             | 9                     | Positive |
| Enrofloxacin     | Quantifier | 360.0               | 342.1             | 18                    | Positive |
|                  | Qualifier  | 360.0               | 316.2             | 18                    | Positive |
| Difloxacin       | Quantifier | 400.1               | 382.1             | 20                    | Positive |
|                  | Qualifier  | 400.1               | 356.2             | 16                    | Positive |
| Sulfamethoxazole | Quantifier | 254.1               | 156.0             | 10                    | Positive |
|                  | Qualifier  | 254.1               | 92.0              | 26                    | Positive |
| Oxolinic acid    | Quantifier | 262.1               | 244.0             | 13                    | Positive |
|                  | Qualifier  | 262.1               | 216.0             | 30                    | Positive |
| Tilmicosin       | Quantifier | 869.6               | 174.1             | 40                    | Positive |
|                  | Qualifier  | 869.6               | 696.4             | 44                    | Positive |
| Flumequine       | Quantifier | 291.1               | 244.0             | 13                    | Positive |
|                  | Qualifier  | 291.1               | 202.0             | 33                    | Positive |

**Table S3.** Results of the UHPLC-MS/MS intra-day and inter-day precision study for the peak areas.

| Analyte          | Level 1: 25 µg/L        |       |       |                          | Level 2: 40 µg/L        |       |       |                          | Level 3: 80 µg/L        |       |       |                          |
|------------------|-------------------------|-------|-------|--------------------------|-------------------------|-------|-------|--------------------------|-------------------------|-------|-------|--------------------------|
|                  | Intra-day RSD (% , n=5) |       |       | Inter-day RSD (% , n=15) | Intra-day RSD (% , n=5) |       |       | Inter-day RSD (% , n=15) | Intra-day RSD (% , n=5) |       |       | Inter-day RSD (% , n=15) |
|                  | Day 1                   | Day 2 | Day 3 |                          | Day 1                   | Day 2 | Day 3 |                          | Day 1                   | Day 2 | Day 3 |                          |
| Sulfadiazine     | 0.95                    | 0.16  | 0.59  | 14.49                    | 0.21                    | 0.74  | 0.42  | 13.00                    | 1.53                    | 0.84  | 0.27  | 12.38                    |
| Diaveridine      | 1.10                    | 1.12  | 0.40  | 15.08                    | 0.83                    | 0.06  | 0.27  | 5.08                     | 0.13                    | 0.74  | 0.17  | 2.24                     |
| Trimethoprim     | 1.10                    | 1.01  | 0.36  | 11.89                    | 0.37                    | 0.21  | 0.41  | 1.95                     | 0.28                    | 0.52  | 0.27  | 0.82                     |
| Marbofloxacin    | 1.05                    | 1.74  | 1.47  | 10.41                    | 0.88                    | 2.19  | 1.59  | 12.43                    | 2.23                    | 1.67  | 1.24  | 8.74                     |
| Enrofloxacin     | 1.04                    | 1.90  | 1.82  | 11.73                    | 0.50                    | 1.75  | 0.99  | 10.21                    | 1.18                    | 2.58  | 0.98  | 13.47                    |
| Difloxacin       | 1.00                    | 0.22  | 0.79  | 13.05                    | 0.38                    | 1.18  | 0.23  | 10.44                    | 0.59                    | 1.99  | 0.50  | 14.53                    |
| Sulfamethoxazole | 0.96                    | 0.29  | 0.36  | 12.69                    | 0.06                    | 0.25  | 0.30  | 5.12                     | 0.29                    | 0.43  | 0.04  | 4.99                     |
| Oxolinic acid    | 2.67                    | 4.64  | 1.74  | 3.21                     | 1.64                    | 4.00  | 1.43  | 2.36                     | 0.90                    | 2.64  | 0.42  | 13.49                    |
| Tilmicosin       | 0.33                    | 1.68  | 0.50  | 13.91                    | 0.14                    | 1.71  | 0.17  | 5.36                     | 0.98                    | 1.13  | 0.54  | 2.45                     |
| Flumequine       | 1.69                    | 3.04  | 1.07  | 12.35                    | 0.27                    | 2.13  | 0.55  | 14.07                    | 0.68                    | 1.89  | 0.20  | 1.15                     |

**TableS4.** Results of UHPLC-MS/MS intra-day and inter-day precision study for the retention times.

| Analyte          | Level 1: 25 µg/L        |       |       |                          | Level 2: 40 µg/L        |       |       |                          | Level 3: 80 µg/L        |       |       |                          |
|------------------|-------------------------|-------|-------|--------------------------|-------------------------|-------|-------|--------------------------|-------------------------|-------|-------|--------------------------|
|                  | Intra-day RSD (% , n=5) |       |       | Inter-day RSD (% , n=15) | Intra-day RSD (% , n=5) |       |       | Inter-day RSD (% , n=15) | Intra-day RSD (% , n=5) |       |       | Inter-day RSD (% , n=15) |
|                  | Day 1                   | Day 2 | Day 3 |                          | Day 1                   | Day 2 | Day 3 |                          | Day 1                   | Day 2 | Day 3 |                          |
| Sulfadiazine     | 0.15                    | 0.00  | 0.00  | 0.14                     | 0.00                    | 0.15  | 0.00  | 0.14                     | 0.00                    | 0.15  | 0.00  | 0.19                     |
| Diaveridine      | 0.13                    | 0.00  | 0.13  | 0.07                     | 0.00                    | 0.13  | 0.00  | 0.11                     | 0.13                    | 0.13  | 0.00  | 0.20                     |
| Trimethoprim     | 0.00                    | 0.00  | 0.11  | 0.10                     | 0.00                    | 0.11  | 0.00  | 0.10                     | 0.00                    | 0.11  | 0.11  | 0.07                     |
| Marbofloxacin    | 0.11                    | 0.00  | 0.11  | 0.04                     | 0.00                    | 0.11  | 0.00  | 0.16                     | 0.11                    | 0.00  | 0.00  | 0.16                     |
| Enrofloxacin     | 0.00                    | 0.00  | 0.09  | 0.08                     | 0.09                    | 0.00  | 0.00  | 0.12                     | 0.00                    | 0.00  | 0.00  | 0.09                     |
| Difloxacin       | 0.00                    | 0.08  | 0.08  | 0.05                     | 0.00                    | 0.08  | 0.00  | 0.15                     | 0.08                    | 0.00  | 0.00  | 0.11                     |
| Sulfamethoxazole | 0.07                    | 0.07  | 0.07  | 0.07                     | 0.07                    | 0.00  | 0.00  | 0.12                     | 0.00                    | 0.00  | 0.00  | 0.07                     |
| Oxolinic acid    | 0.07                    | 0.00  | 0.07  | 0.04                     | 0.07                    | 0.00  | 0.00  | 0.09                     | 0.00                    | 0.00  | 0.00  | 0.07                     |
| Tilmicosin       | 0.07                    | 0.00  | 0.07  | 0.37                     | 0.07                    | 0.06  | 0.00  | 0.31                     | 0.00                    | 0.00  | 0.07  | 0.18                     |
| Flumequine       | 0.00                    | 0.00  | 0.00  | 0.00                     | 0.00                    | 0.00  | 0.00  | 0.06                     | 0.00                    | 0.00  | 0.00  | 0.06                     |

**Table S5.-** Solvent and matrix-matched calibration data of the target analytes.

| Analyte       | Solvent/Matrix matched calibration | Studied linear range (µg/L) | Regression equation (n=10)               |                                             | S <sub>y/x</sub> | R <sup>2</sup> | LCL (µg/L) |
|---------------|------------------------------------|-----------------------------|------------------------------------------|---------------------------------------------|------------------|----------------|------------|
|               |                                    |                             | $b \pm Sb \cdot t_{(0.05;8)}$            | $a \pm Sa \cdot t_{(0.05;8)}$               |                  |                |            |
| Sulfadiazine  | Solvent                            | 3-80                        | $4.990 \cdot 10^3 \pm 0.097 \cdot 10^3$  | $-2.709 \cdot 10^3 \pm 3.657 \cdot 10^3$    | 2993             | 0.9994         | 3          |
|               | European sea bass                  | 3-80                        | $3.496 \cdot 10^3 \pm 0.262 \cdot 10^3$  | $7.476 \cdot 10^3 \pm 9.881 \cdot 10^3$     | 8086             | 0.9916         | 3          |
|               | Gilt-head sea bream                | 3-80                        | $1.270 \cdot 10^3 \pm 0.120 \cdot 10^3$  | $5.266 \cdot 10^3 \pm 4.192 \cdot 10^3$     | 3136             | 0.9911         | 3          |
| Diaveridine   | Solvent                            | 5-80                        | $26.017 \cdot 10^3 \pm 1.426 \cdot 10^3$ | $91.995 \cdot 10^3 \pm 64.784 \cdot 10^3$   | 48718            | 0.9955         | 5          |
|               | European sea bass                  | 5-80                        | $24.962 \cdot 10^3 \pm 1.551 \cdot 10^3$ | $86.777 \cdot 10^3 \pm 70.487 \cdot 10^3$   | 53007            | 0.9942         | 5          |
|               | Gilt-head sea bream                | 5-80                        | $21.327 \cdot 10^3 \pm 1.165 \cdot 10^3$ | $54.176 \cdot 10^3 \pm 52.960 \cdot 10^3$   | 39827            | 0.9955         | 5          |
| Trimethoprim  | Solvent                            | 5-80                        | $17.780 \cdot 10^3 \pm 1.260 \cdot 10^3$ | $86.990 \cdot 10^3 \pm 57.252 \cdot 10^3$   | 43054            | 0.9925         | 5          |
|               | European sea bass                  | 5-80                        | $18.517 \cdot 10^3 \pm 1.423 \cdot 10^3$ | $94.200 \cdot 10^3 \pm 64.671 \cdot 10^3$   | 48633            | 0.9912         | 5          |
|               | Gilt-head sea bream                | 5-80                        | $17.039 \cdot 10^3 \pm 1.016 \cdot 10^3$ | $71.136 \cdot 10^3 \pm 46.190 \cdot 10^3$   | 34736            | 0.9947         | 5          |
| Marbofloxacin | Solvent                            | 10-100                      | $3.147 \cdot 10^3 \pm 0.294 \cdot 10^3$  | $-36.995 \cdot 10^3 \pm 16.161 \cdot 10^3$  | 10396            | 0.9913         | 10         |
|               | European sea bass                  | 10-100                      | $5.557 \cdot 10^3 \pm 0.197 \cdot 10^3$  | $-7.939 \cdot 10^3 \pm 10.889 \cdot 10^3$   | 7662             | 0.9981         | 10         |
|               | Gilt-head sea bream                | 10-100                      | $5.003 \cdot 10^3 \pm 2.879 \cdot 10^3$  | $-0.883 \cdot 10^3 \pm 15.931 \cdot 10^3$   | 11210            | 0.9950         | 10         |
| Enrofloxacin  | Solvent                            | 10-100                      | $10.786 \cdot 10^3 \pm 0.771 \cdot 10^3$ | $-118.766 \cdot 10^3 \pm 42.684 \cdot 10^3$ | 30033            | 0.9924         | 10         |
|               | European sea bass                  | 10-100                      | $15.836 \cdot 10^3 \pm 0.880 \cdot 10^3$ | $31.528 \cdot 10^3 \pm 48.714 \cdot 10^3$   | 34276            | 0.9954         | 10         |
|               | Gilt-head sea bream                | 10-100                      | $14.165 \cdot 10^3 \pm 0.703 \cdot 10^3$ | $47.979 \cdot 10^3 \pm 38.909 \cdot 10^3$   | 27377            | 0.9963         | 10         |
| Difloxacin    | Solvent                            | 10-100                      | $10.089 \cdot 10^3 \pm 0.755 \cdot 10^3$ | $-100.419 \cdot 10^3 \pm 41.779 \cdot 10^3$ | 29396            | 0.9916         | 10         |
|               | European sea bass                  | 10-100                      | $13.169 \cdot 10^3 \pm 0.593 \cdot 10^3$ | $10.771 \cdot 10^3 \pm 32.834 \cdot 10^3$   | 23103            | 0.9970         | 10         |
|               | Gilt-head sea bream                | 10-100                      | $12.309 \cdot 10^3 \pm 0.430 \cdot 10^3$ | $19.246 \cdot 10^3 \pm 23.816 \cdot 10^3$   | 16757            | 0.9982         | 10         |
|               | Solvent                            | 3-80                        | $4.329 \cdot 10^3 \pm 0.073 \cdot 10^3$  | $-2.159 \cdot 10^3 \pm 2.762 \cdot 10^3$    | 2260             | 0.9996         | 3          |

| Analyte          | Solvent/Matrix matched calibration | Studied linear range (µg/L) | Regression equation (n=10)               |                                             | s <sub>y/x</sub> | R <sup>2</sup> | LCL (µg/L) |
|------------------|------------------------------------|-----------------------------|------------------------------------------|---------------------------------------------|------------------|----------------|------------|
|                  |                                    |                             | $b \pm s_b \cdot t_{(0.05;8)}$           | $a \pm s_a \cdot t_{(0.05;8)}$              |                  |                |            |
| Sulfamethoxazole | European sea bass                  | 3-80                        | $3.255 \cdot 10^3 \pm 0.248 \cdot 10^3$  | $11.962 \cdot 10^3 \pm 9.543 \cdot 10^3$    | 7464             | 0.9928         | 3          |
|                  | Gilt-head sea bream                | 3-80                        | $1.645 \cdot 10^3 \pm 0.155 \cdot 10^3$  | $6.804 \cdot 10^3 \pm 5.407 \cdot 10^3$     | 4045             | 0.9912         | 3          |
| Oxolinic acid    | Solvent                            | 5-80                        | $10.640 \cdot 10^3 \pm 0.282 \cdot 10^3$ | $-10.192 \cdot 10^3 \pm 12.818 \cdot 10^3$  | 9640             | 0.9989         | 5          |
|                  | European sea bass                  | 5-80                        | $10.969 \cdot 10^3 \pm 0.866 \cdot 10^3$ | $-29.787 \cdot 10^3 \pm 39.332 \cdot 10^3$  | 29578            | 0.9907         | 5          |
|                  | Gilt-head sea bream                | 5-80                        | $8.655 \cdot 10^3 \pm 0.401 \cdot 10^3$  | $-1.082 \cdot 10^3 \pm 18.223 \cdot 10^3$   | 13704            | 0.9968         | 5          |
| Tilmicosin       | Solvent                            | 3-80                        | $1.487 \cdot 10^3 \pm 0.049 \cdot 10^3$  | $-2.881 \cdot 10^3 \pm 2.105 \cdot 10^3$    | 1801             | 0.9983         | 3          |
|                  | European sea bass                  | 3-80                        | $1.895 \cdot 10^3 \pm 0.029 \cdot 10^3$  | $-0.836 \cdot 10^3 \pm 1.139 \cdot 10^3$    | 960              | 0.9996         | 3          |
|                  | Gilt-head sea bream                | 3-80                        | $1.570 \cdot 10^3 \pm 0.034 \cdot 10^3$  | $-0.581 \cdot 10^3 \pm 1.464 \cdot 10^3$    | 1253             | 0.9993         | 3          |
| Flumequine       | Solvent                            | 3-80                        | $39.087 \cdot 10^3 \pm 2.517 \cdot 10^3$ | $164.818 \cdot 10^3 \pm 107.254 \cdot 10^3$ | 91774            | 0.9938         | 3          |
|                  | European sea bass                  | 3-80                        | $32.062 \cdot 10^3 \pm 1.644 \cdot 10^3$ | $69.053 \cdot 10^3 \pm 71.771 \cdot 10^3$   | 60887            | 0.9961         | 3          |
|                  | Gilt-head sea bream                | 3-80                        | $34.607 \cdot 10^3 \pm 2.626 \cdot 10^3$ | $139.975 \cdot 10^3 \pm 111.912 \cdot 10^3$ | 95760            | 0.9914         | 3          |

a: intercept; b: slope; s<sub>a</sub>: standard deviation of the intercept; s<sub>b</sub>: standard deviation of the slope; s<sub>y/x</sub>: standard deviation of the estimate; R<sup>2</sup>: determination coefficient.

**Table S6.-** Limits of quantification of the method in European sea bass and gilt-head sea bream.

| Analyte          | Matrix              | LOQ <sub>method</sub> (ng/g) |
|------------------|---------------------|------------------------------|
| Sulfadiazine     | European sea bass   | 21.8                         |
|                  | Gilt-head sea bream | 25.7                         |
| Diaveridine      | European sea bass   | 26.8                         |
|                  | Gilt-head sea bream | 26.4                         |
| Trimethoprim     | European sea bass   | 27.1                         |
|                  | Gilt-head sea bream | 26.5                         |
| Marbofloxacin    | European sea bass   | 111.9                        |
|                  | Gilt-head sea bream | 96.9                         |
| Enrofloxacin     | European sea bass   | 68.6                         |
|                  | Gilt-head sea bream | 62.6                         |
| Difloxacin       | European sea bass   | 61.1                         |
|                  | Gilt-head sea bream | 58.8                         |
| Sulfamethoxazole | European sea bass   | 20.5                         |
|                  | Gilt-head sea bream | 23.8                         |
| Oxalinic acid    | European sea bass   | 30.4                         |
|                  | Gilt-head sea bream | 30.3                         |
| Tilmicosin       | European sea bass   | 34.6                         |
|                  | Gilt-head sea bream | 30.8                         |
| Flumequine       | European sea bass   | 35.8                         |
|                  | Gilt-head sea bream | 32.6                         |

**Table S7.-** Concentrations of the different target analytes found in European sea bass (n=10) and gilt-head sea bream (n=10) samples.

| Analyte          | Gilt-head sea bream 1 | Gilt-head sea bream 2 | Gilt-head sea bream 3 | Gilt-head sea bream 4 | Gilt-head sea bream 5 | Gilt-head sea bream 6 | Gilt-head sea bream 7 | Gilt-head sea bream 8 | Gilt-head sea bream 9 | Gilt-head sea bream 10 |
|------------------|-----------------------|-----------------------|-----------------------|-----------------------|-----------------------|-----------------------|-----------------------|-----------------------|-----------------------|------------------------|
| Sulfadiazine     | ND                     |
| Diaveridine      | ND                     |
| Trimethoprim     | ND                     |
| Marbofloxacin    | ND                     |
| Enrofloxacin     | ND                     |
| Difloxacin       | ND                     |
| Sulfamethoxazole | ND                     |
| Oxolinic acid    | ND                     |
| Tilmicosin       | ND                     |
| Flumequine       | ND                     |
| Analyte          | European sea bass 1   | European sea bass 2   | European sea bass 3   | European sea bass 4   | European sea bass 5   | European sea bass 6   | European sea bass 7   | European sea bass 8   | European sea bass 9   | European sea bass 10   |
| Sulfadiazine     | ND                     |
| Diaveridine      | ND                     |
| Trimethoprim     | ND                     |
| Marbofloxacin    | ND                     |
| Enrofloxacin     | ND                     |
| Difloxacin       | ND                     |
| Sulfamethoxazole | ND                     |
| Oxolinic acid    | <LOQ                   |
| Tilmicosin       | ND                    | <LOQ                  | <LOQ                   |
| Flumequine       | ND                     |

LOQ: limit of quantification of the method; ND: not detected
